# Supplementary material for: Left Atrial Appendage Occlusion and Post-procedural Antithrombotic Management
Source: MDPI journal article supplement (doi:10.3390/jcm13030803), 2024-01-30
Supplement: s1 [file s1]

**Supplementary Table S1.** Studies reporting on patients discharged on no antithrombotic therapy.

| Study                    | Publ. | No therapy<br>(%Total) | DRT   | Ischemic<br>stroke | Bleeding |
|--------------------------|-------|------------------------|-------|--------------------|----------|
| ACP Registry [1]         | 2016  | 87 (8%)                | -     | -                  | -        |
| EWOLUTION Registry [2]   | 2017  | 65 (6%)                | 2.3%% | 0.0%%              | 1.6%     |
| AMULET Registry [3]      | 2018  | 23 (2%)                | 0.0%  | -                  | 13%      |
| Fauchier et al. [4]      | 2018  | 35 (8%)                | 22.2% | -                  | -        |
| Darmon [5]               | 2020  | 22 (15%)               | 0.0%  | 0.0%               | 0.0%     |
| Cepas-Guillén et al. [6] | 2023  | 117 (9%)               | -     | -                  | -        |

1. Tzikas, A.; Shakir, S.; Gafoor, S.; Omran, H.; Berti, S.; Santoro, G.; Kefer, J.; Landmesser, U.; Nielsen-Kudsk, J.E.; Cruz-Gonzalez, I.; et al. Left atrial appendage occlusion for stroke prevention in atrial fibrillation: Multicentre experience with the AMPLATZER Cardiac Plug. *EuroInterv. J. EuroPCR Collab. Work. Group Interv. Cardiol. Eur. Soc. Cardiol.* **2016**, *11*, 1170–1179. [https://doi.org/10.4244/eijy15m01\\_06](https://doi.org/10.4244/eijy15m01_06).
2. Bergmann, M.W.; Betts, T.R.; Sievert, H.; Schmidt, B.; Pokushalov, E.; Kische, S.; Schmitz, T.; Meincke, F.; Stein, K.M.; Boersma, L.V.A.; et al. Safety and efficacy of early anticoagulation drug regimens after WATCHMAN left atrial appendage closure: Three-month data from the EWOLUTION prospective, multicentre, monitored international WATCHMAN LAA closure registry. *EuroInterv. J. EuroPCR Collab. Work. Group Interv. Cardiol. Eur. Soc. Cardiol.* **2017**, *13*, 877–884. <https://doi.org/10.4244/eij-d-17-00042>
3. Landmesser, U.; Tondo, C.; Camm, J.; Diener, H.C.; Paul, V.; Schmidt, B.; Settergren, M.; Teiger, E.; Nielsen-Kudsk, J.E.; Hildick-Smith, D. Left atrial appendage occlusion with the AMPLATZER Amulet device: One-year follow-up from the prospective global Amulet observational registry. *EuroInterv. J. EuroPCR Collab. Work. Group Interv. Cardiol. Eur. Soc. Cardiol.* **2018**, *14*, e590–e597. <https://doi.org/10.4244/eij-d-18-00344>.
4. Fauchier, L.; Cinaud, A.; Brigadeau, F.; Lepillier, A.; Pierre, B.; Abbey, S.; Fatemi, M.; Franceschi, F.; Guedeney, P.; Jacon, P.; et al. Device-Related Thrombosis after Percutaneous Left Atrial Appendage Occlusion for Atrial Fibrillation. *J. Am. Coll. Cardiol.* **2018**, *71*, 1528–1536. <https://doi.org/10.1016/j.jacc.2018.01.076>.
5. Darmon, A.; Couture, E.L.; Stein, G.; Cormier, B.; Chevalier, B.; Lefèvre, T.; Sanguinetti, A.; Horvilleur, J.; Garot, P. Left Atrial Appendage Closure in Patients with Atrial Fibrillation at Very High Bleeding Risk without Postimplantation Antithrombotic Therapy. *J. Invasive Cardiol.* **2020**, *32*, 385–391.
6. Cepas-Guillén, P.; Flores-Umanzor, E.; Leduc, N.; Bajoras, V.; Perrin, N.; Farjat-Pasos, J.; McInerney, A.; Lafond, A.; Millán, X.; Zendjebil, S.; et al. Impact of Device Implant Depth after Left Atrial Appendage Occlusion. *JACC Cardiovasc. Interv.* **2023**, *16*, 2139–2149. <https://doi.org/10.1016/j.jcin.2023.05.045>.
